# Supplementary material
Source: HighWire-hosted journal article supplement (https://www.cmaj.ca/highwire/filestream/77476/field_highwire_adjunct_files/1/200626-five-2-at.pdf)
Supplement: 200626-five-2-at.pdf [file 200626-five-2-at.pdf]

## Appendix 2 (as supplied by authors)

### Resources available for chest imaging and management of COVID-19

- The Canadian Society of Thoracic Radiology (CSTR) and Canadian Association of Radiologists (CAR) consensus statement regarding chest imaging in suspected and confirmed COVID-19. Available from: <https://car.ca/wp-content/uploads/2020/04/CSTR-CAR-Consensus-Statement-Regarding-Chest-Imaging-in-Suspected-or-Confirmed-Covid-19.pdf>
- The role of chest imaging in patient management during the COVID-19 pandemic: A multinational consensus statement from the Fleischner Society. Available: <https://doi.org/10.1148/radiol.2020201365>
- Coronavirus disease (COVID-19): For health professionals. Government of Canada. Available: <https://www.canada.ca/en/public-health/services/diseases/2019-novel-coronavirus-infection/health-professionals.html>
- American College of Radiology recommendations for the use of chest radiography and computed tomography (CT) for suspected COVID-19 infection. Available: <https://www.acr.org/Advocacy-and-Economics/ACR-Position-Statements/Recommendations-for-Chest-Radiography-and-CT-for-Suspected-COVID19-Infection>.
